# Supplementary material for: Syntheses, structures and properties of ruthenium complexes of tridentate ligands: isolation and characterization of a rare example of ruthenium nitrosyl complex containing {RuNO}5 moiety
Source: Royal Society of Chemistry journal article supplement (doi:10.1039/c3dt00027c), 2013-01-01
Supplement: c3dt00027c.pdf [file c3dt00027c.pdf]

## Supporting Information

for

### **Syntheses, Structures and Properties of Ruthenium Complexes of Tridentate Ligands: Isolation and Characterization of a Rare Example of Ruthenium Nitrosyl Complex Containing {RuNO}<sup>5</sup> Moiety**

Kaushik Ghosh\*, Rajan Kumar, Sushil Kumar and Jay Singh Meena

*Department of Chemistry, Indian Institute of Technology Roorkee,*

*Roorkee-247667 Uttarakhand INDIA.*

E-mail: [ghoshfey@iitr.ernet.in](mailto:ghoshfey@iitr.ernet.in)

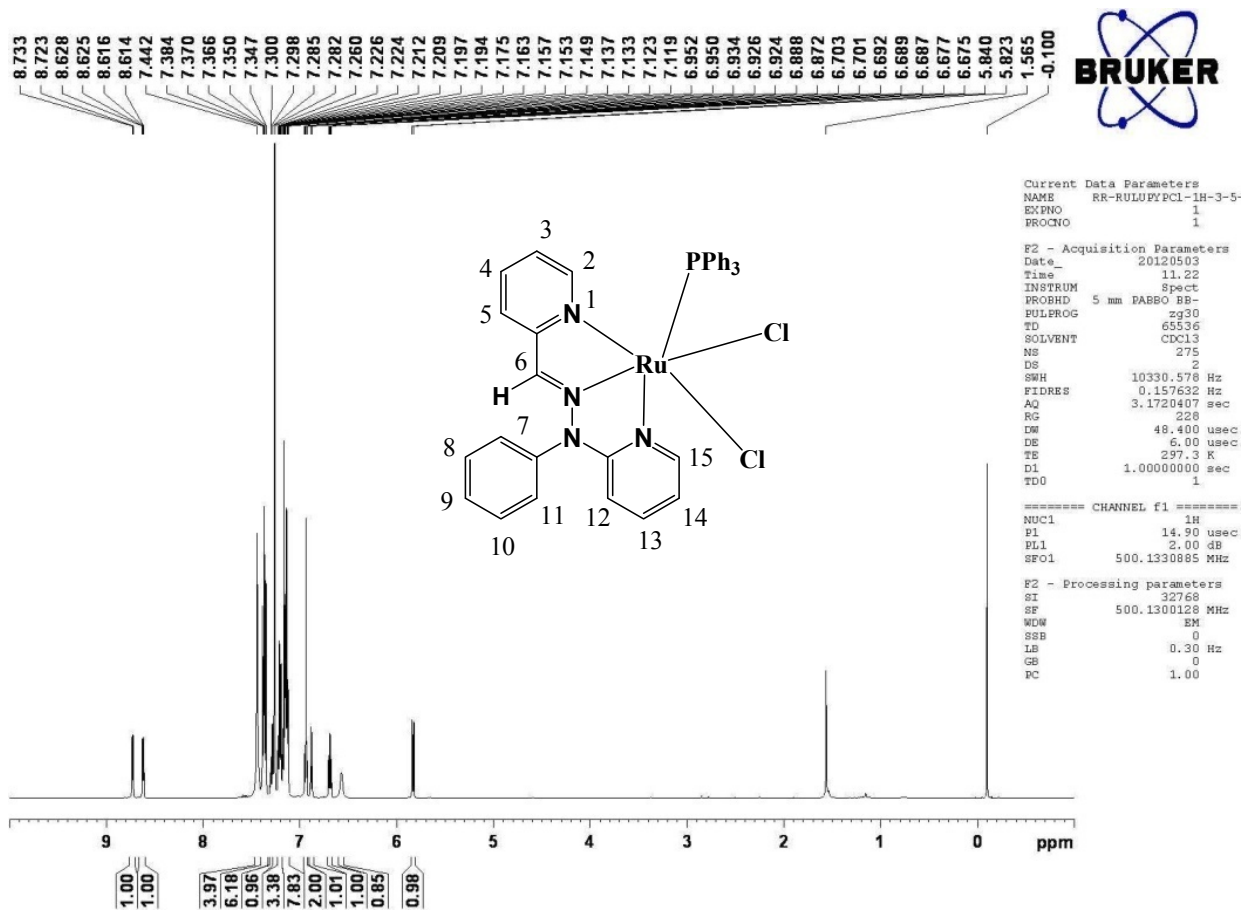

Fig. S1 <sup>1</sup>H NMR spectrum of complex 2 in CDCl<sub>3</sub> at room temperature.

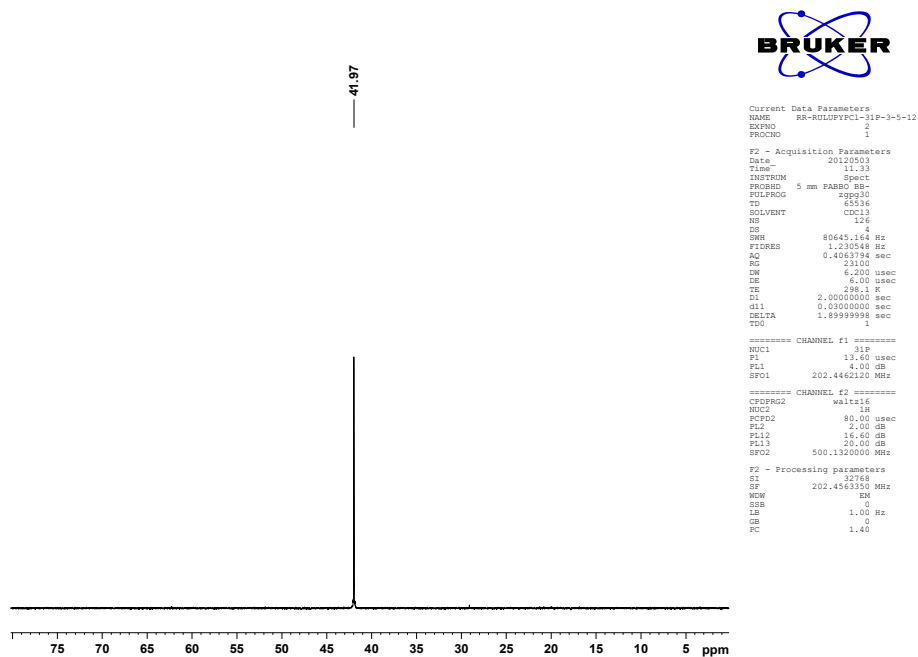

Fig. S2 <sup>31</sup>P NMR spectrum of complex **2** in CDCl<sub>3</sub> at room temperature.

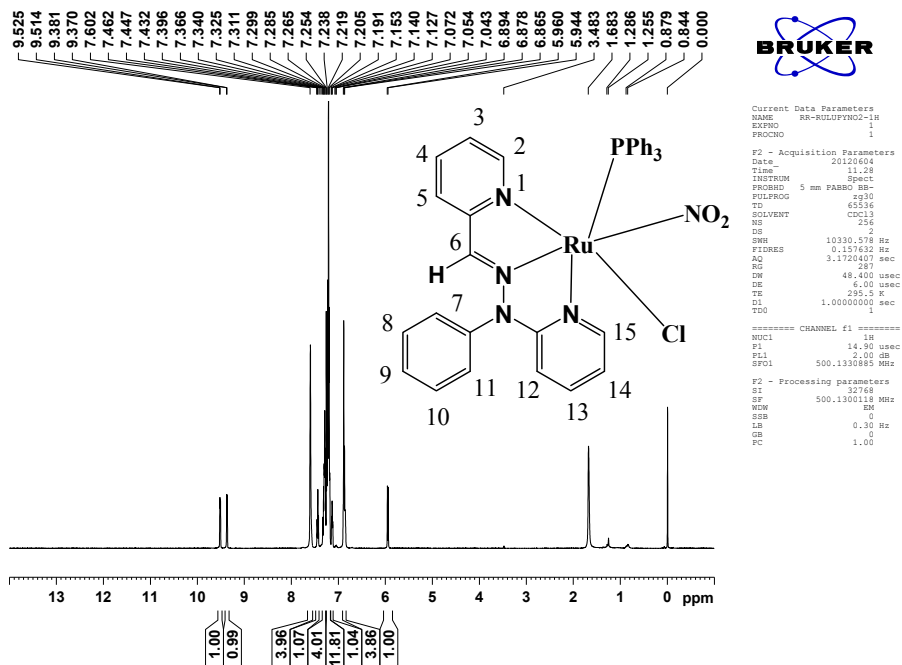

Fig. S3 <sup>1</sup>H NMR spectrum of complex **3** in CDCl<sub>3</sub> at room temperature.

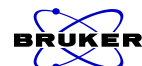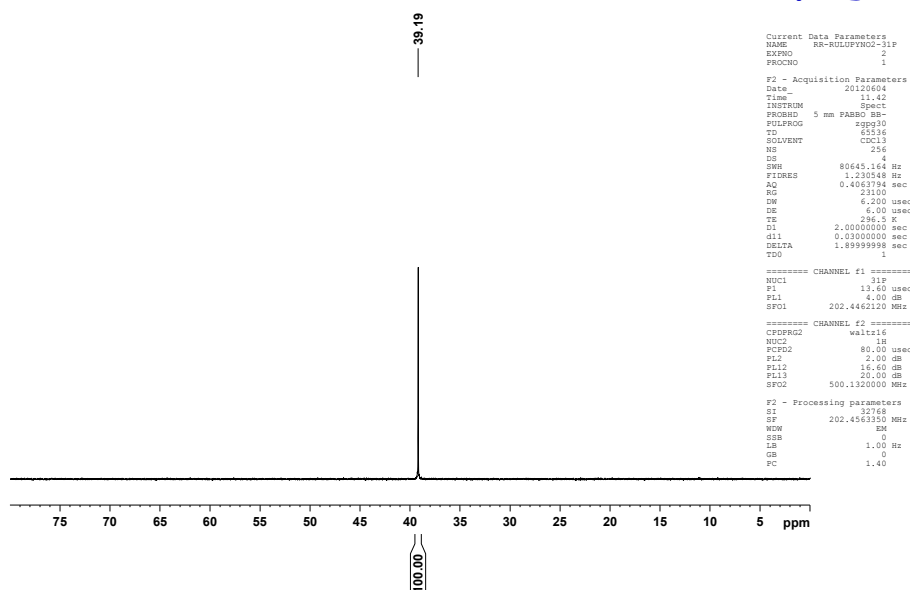

Fig. S4  $^{31}\text{P}$  NMR spectrum of complex **3** in  $\text{CDCl}_3$  at room temperature.

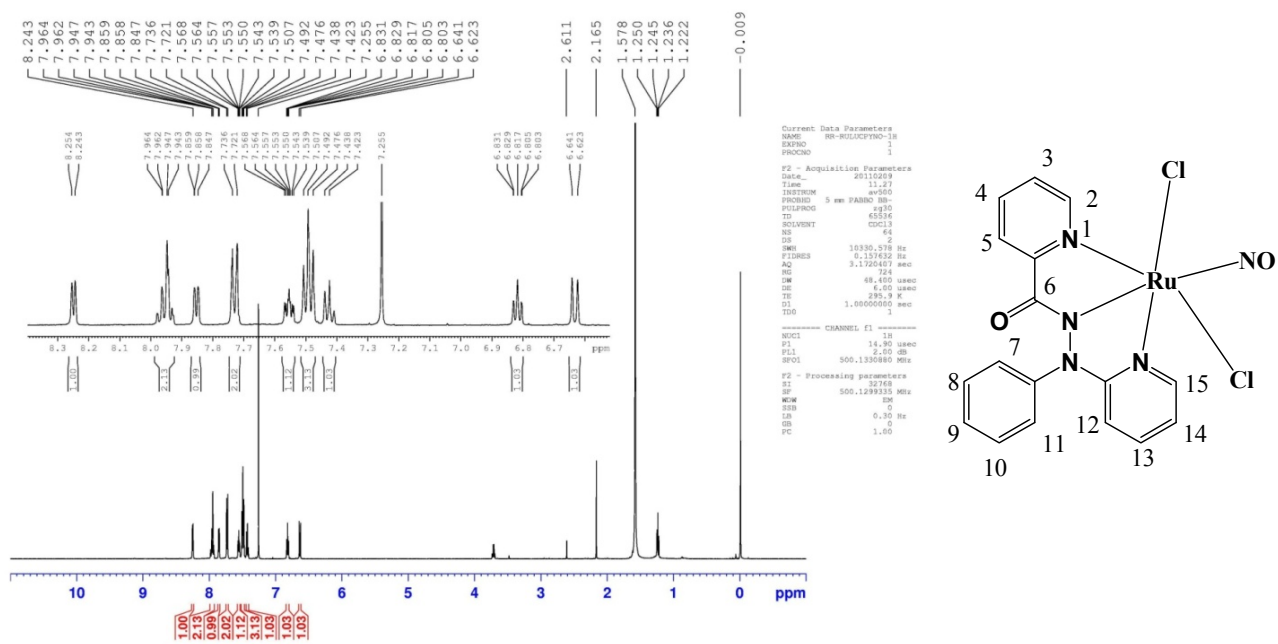

Fig. S5  $^1\text{H}$  NMR spectrum of complex **1** in  $\text{CDCl}_3$  at room temperature.

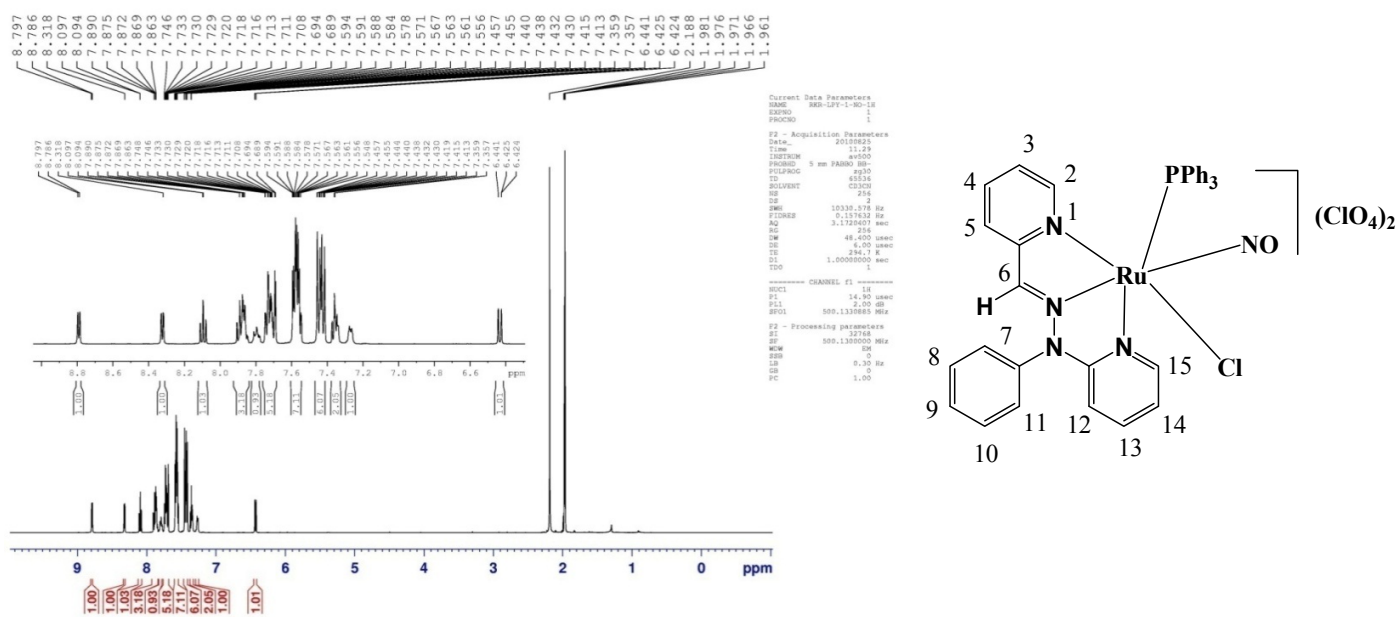

Fig. S6  $^1\text{H}$  NMR spectrum of complex **4** in  $\text{CD}_3\text{CN}$  at room temperature.

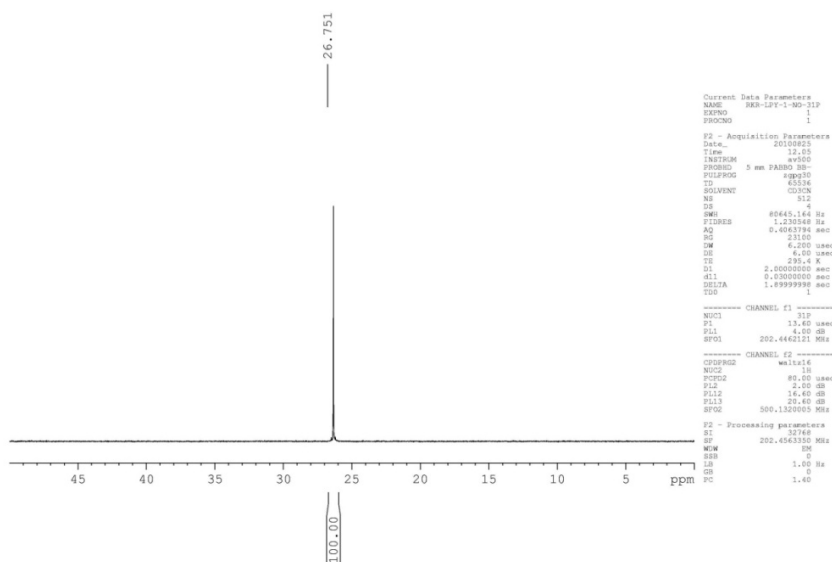

Fig. S7  $^{31}\text{P}$  NMR spectrum of complex **4** in  $\text{CDCl}_3$  at room temperature.

**Table S1**  $^1\text{H}$  NMR Spectral Data [ $\delta$ , ppm ( $J$ , Hz)] of Complexes **1**, **2**, **3**, **4**.

| Compd    | 2-H  | 11-H | 7-H  | 15-H | 6-H  | Other protons                                   |
|----------|------|------|------|------|------|-------------------------------------------------|
| <b>1</b> | 8.25 | 6.67 | 6.84 | 7.84 | –    | 7.93–7.4 (ligand-H)                             |
| <b>2</b> | 8.73 | 5.84 | 6.57 | 8.62 | 7.34 | 7.44–6.92 (PPh <sub>3</sub> , 15H and ligand-H) |
| <b>3</b> | 9.52 | 5.95 | 6.86 | 9.37 | 7.45 | 7.34–7.12 (PPh <sub>3</sub> , 15H and ligand-H) |
| <b>4</b> | 8.79 | 6.43 | 7.35 | 8.31 | 7.63 | 7.89–7.48 (PPh <sub>3</sub> , 15H and ligand-H) |

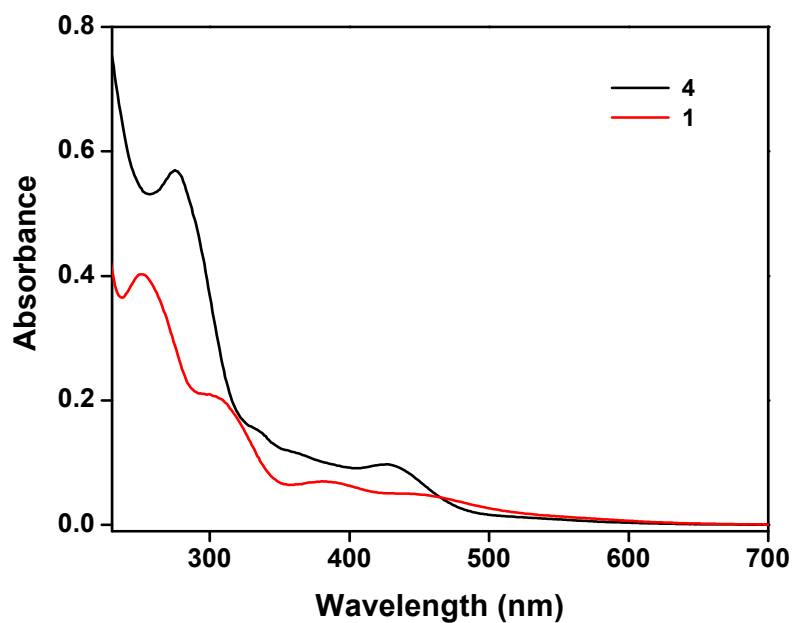

**Fig. S8** Electronic absorption spectra of **1** (red line) and **4** (black line) in acetonitrile solutions.

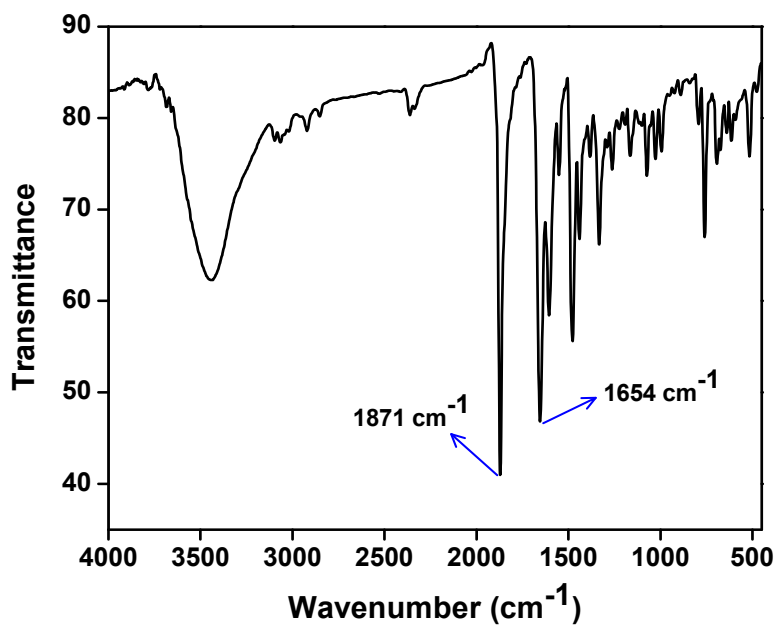

**Fig. S9** Infrared spectrum of complex 1. IR (KBr disk, cm<sup>-1</sup>): 1871 ( $\nu_{\text{NO}}$ ) and 1654 ( $\nu_{\text{CONH}}$ ) cm<sup>-1</sup>.

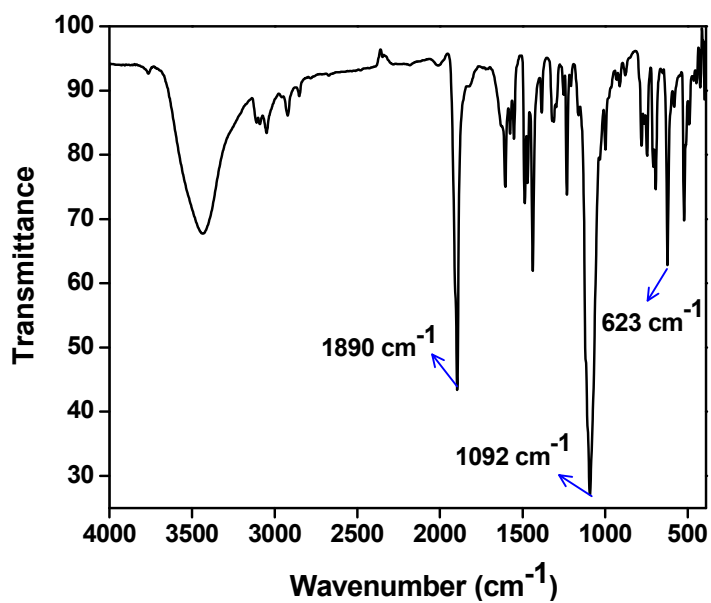

**Fig. S10** Infrared spectrum of complex 4. IR (KBr disk, cm<sup>-1</sup>): 1890 ( $\nu_{\text{NO}}$ ), 1092, 623 ( $\nu_{\text{ClO}_4}$ ), 746, 694, 522 ( $\nu_{\text{PPh}_3}$ ) cm<sup>-1</sup>.

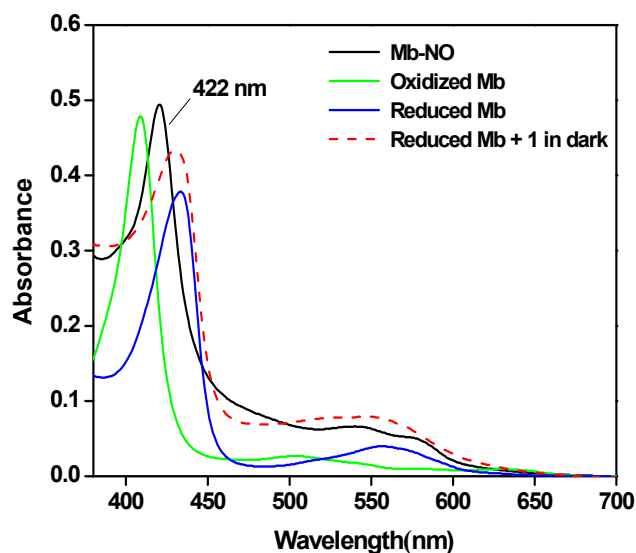

**Fig. S11** Electronic spectra of conversion of reduced myoglobin to Mb–NO adduct upon reaction with **1** in buffer solution (50 mM phosphate buffer, pH 6.8) under exposure of UV light. Green line, Met Mb (intense band at 409 nm); blue line, reduced Mb (near 433 nm, with excess of sodium dithionite); red dotted line, reduced Mb + solution of **1** ( $\sim 4.5 \times 10^{-5}$  M) in dark; black line, Mb–NO adduct for **1** at 422 nm when same solutions were exposed to UV light for 2-3 minutes.

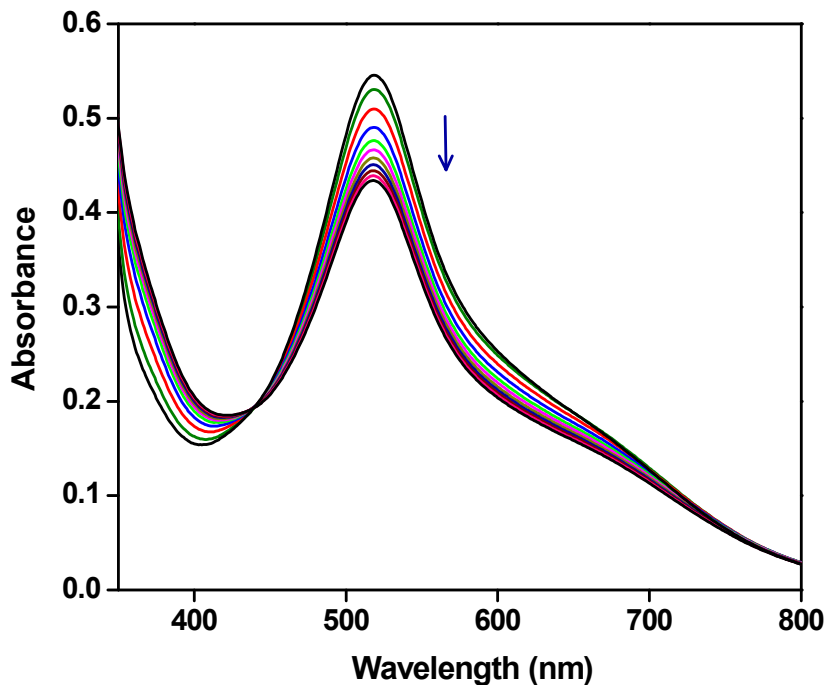

**Fig. S12** Reaction of photoreleased NO derived from complex **1** with DPPH radical ( $\sim 10^{-5}$  M) in acetonitrile solution.



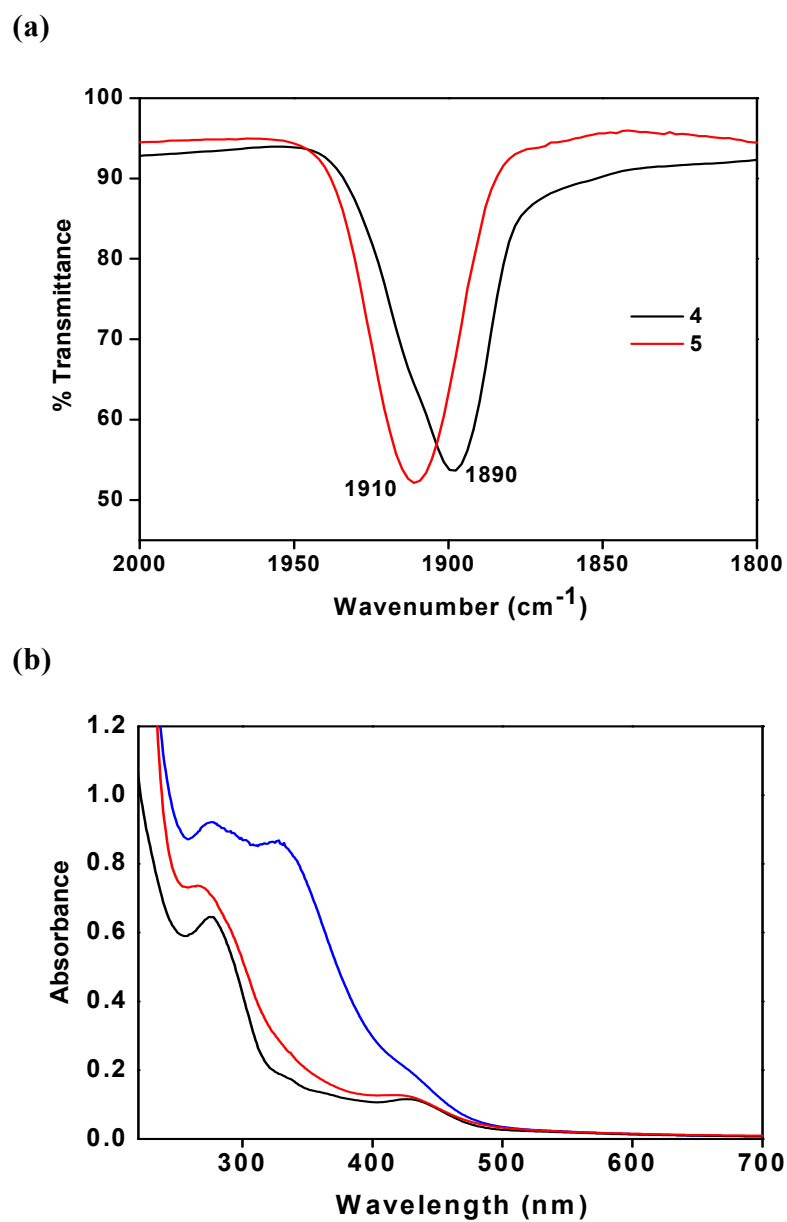

**Fig. S13** (a) Infrared and (b) UV-Vis spectra (black line, complex **4**; blue line, **4** (1 mM) + CAN (8 mM); red line, **4** (1 mM) + CAN (8 mM) + sodium dithionite (2 mM)) showing the conversion of  $\{\text{RuNO}\}^6$  to  $\{\text{RuNO}\}^5$  species when complex **4** was treated with ceric ammonium nitrate in acetonitrile solution.

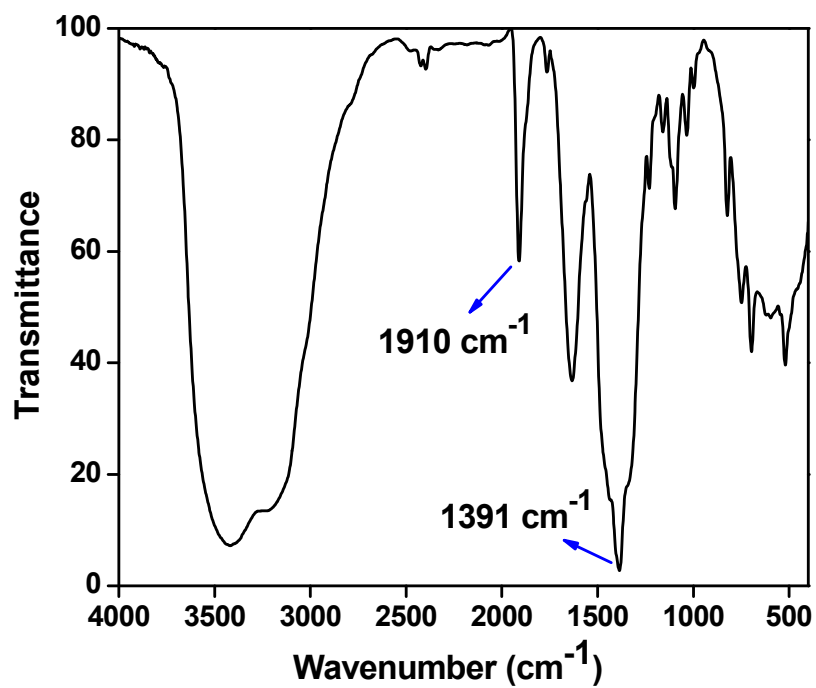

**Fig. S14** Infrared spectrum of complex **5**. IR (KBr disk, cm<sup>-1</sup>): 1910 ( $\nu_{\text{NO}}$ ), 1391 ( $\nu_{\text{NO}_3}$ ), 1085, 750, 695, 518 ( $\nu_{\text{PPh}_3}$ ) cm<sup>-1</sup>.

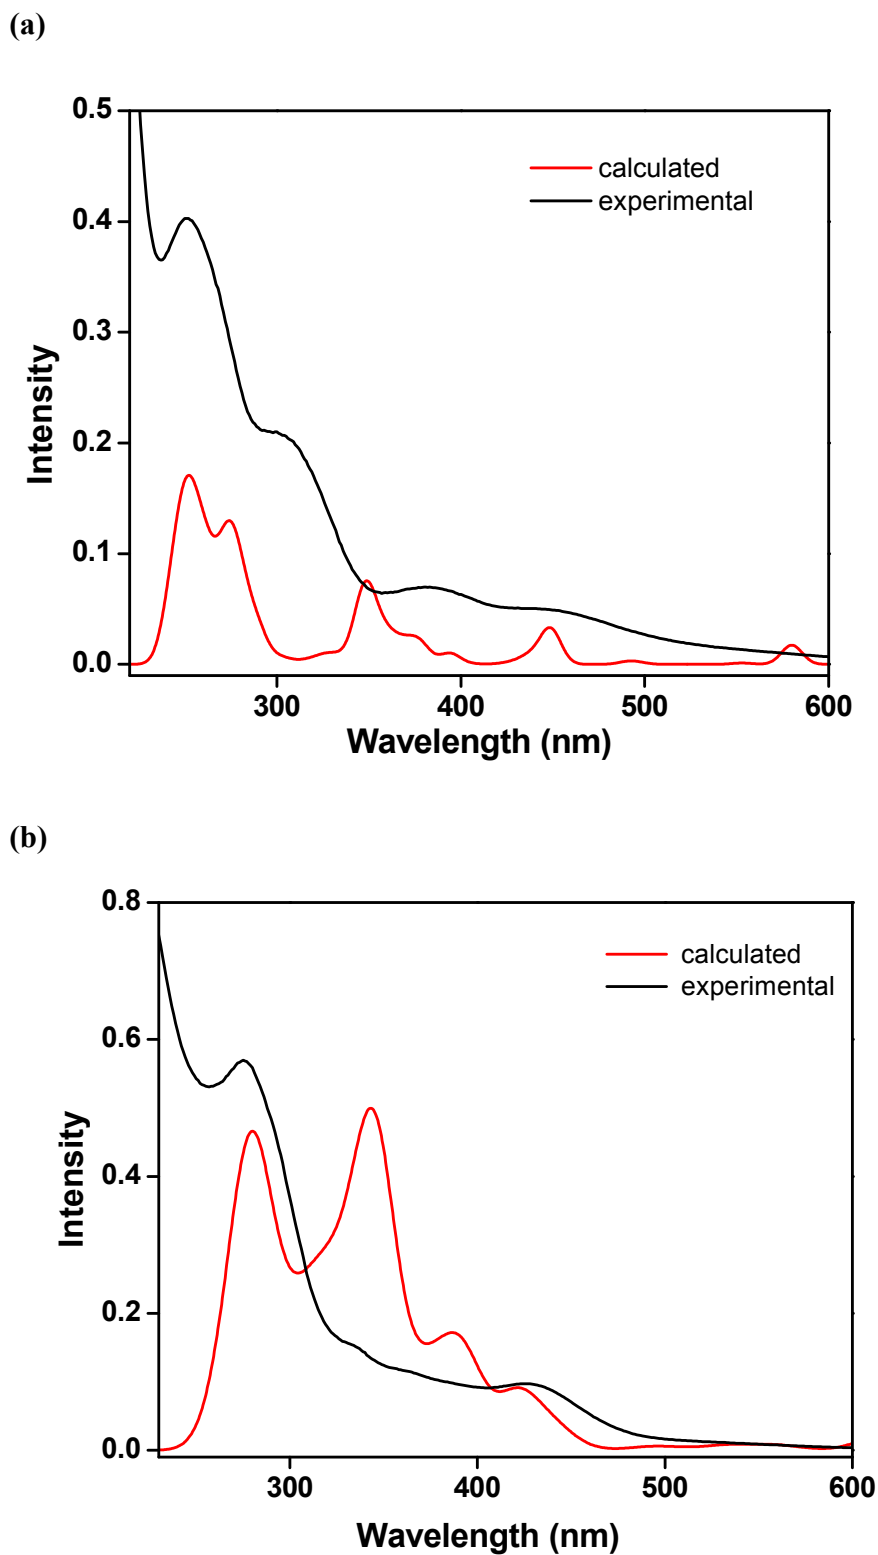

**Fig. S15** Experimental and TDDFT calculated absorption spectra of (a) complex **1** and (b) complex **4**.

**Table S2** Selected bond distances (Å) and bond angles (°) for nitrosyl complexes **1** and **4** along with the optimized DFT bond parameters for comparison.

| Bond lengths (Å) |              |            | Bond angles (deg.) |              |            |
|------------------|--------------|------------|--------------------|--------------|------------|
| Complex 1        |              |            |                    |              |            |
|                  | <b>X-ray</b> | <b>DFT</b> |                    | <b>X-ray</b> | <b>DFT</b> |
| Ru(1)–Cl(1)      | 2.3678(8)    | 2.471      | N(1)–Ru(1)–N(4)    | 157.61(8)    | 156.81     |
| Ru(1)–Cl(2)      | 2.3882(8)    | 2.499      | N(2)–Ru(1)–N(5)    | 173.51(10)   | 174.22     |
| Ru(1)–N(2)       | 1.977(2)     | 1.993      | Cl(1)Ru(1)–Cl(2)   | 175.55(3)    | 176.14     |
| Ru(1)–N(1)       | 2.074(2)     | 2.083      | N(1)–Ru(1)–N(2)    | 79.12(9)     | 78.16      |
| Ru(1)–N(4)       | 2.052(2)     | 2.098      | N(4)–Ru(1)–N(2)    | 78.59(9)     | 78.91      |
| Ru(1)–N(5)       | 1.761(2)     | 1.782      | N(4)–Ru(1)–Cl(1)   | 88.88(7)     | 87.76      |
| N(5)–O(2)        | 1.147(3)     | 1.197      | N(4)–Ru(1)–Cl(2)   | 90.14(7)     | 92.05      |
|                  |              |            | O(2)–N(5)–Ru(1)    | 169.4(2)     | 171.89     |
| Complex 4        |              |            |                    |              |            |
| Ru(1)–Cl(1)      | 2.3858(12)   | 2.473      | N(3)–Ru(1)–N(2)    | 77.71(15)    | 77.70      |
| Ru(1)–P(1)       | 2.4057(13)   | 2.581      | N(1)–Ru(1)–N(4)    | 96.44(16)    | 103.03     |
| Ru(1)–N(4)       | 2.082(3)     | 2.118      | P(1)–Ru(1)–Cl(1)   | 173.71(5)    | 175.35     |
| Ru(1)–N(3)       | 2.002(4)     | 2.051      | N(4)–Ru(1)–N(3)    | 78.17(15)    | 78.13      |
| Ru(1)–N(2)       | 2.077(3)     | 2.100      | N(4)–Ru(1)–N(2)    | 155.39(14)   | 155.52     |
| Ru(1)–N(1)       | 1.731(4)     | 1.776      | N(2)–Ru(1)–P(1)    | 92.53(9)     | 93.94      |
| N(1)–O(1)        | 1.142(4)     | 1.184      | N(1)–Ru(1)–P(1)    | 89.88(12)    | 94.95      |
|                  |              |            | O(1)–N(1)–Ru(1)    | 173.7(4)     | 172.31     |

**Table S3** Calculated HOMO compositions (in %) expressed in terms of individual fragments.

| Complex                                                                   | Ru | Cl | NO | Other |
|---------------------------------------------------------------------------|----|----|----|-------|
| [Ru(L <sup>1</sup> )(NO)Cl <sub>2</sub> ] ( <b>1</b> )                    | 2  | 6  | 8  | 83    |
| [Ru(L <sup>2</sup> )(PPh <sub>3</sub> )(NO)Cl] <sup>2+</sup> ( <b>4</b> ) | 5  | 6  | 0  | 89    |
| [Ru(L <sup>2</sup> )(PPh <sub>3</sub> )(NO)Cl] <sup>3+</sup> ( <b>5</b> ) | 8  | 7  | 1  | 84    |

**Table S4** Calculated TD-DFT excitation energies (in eV), oscillator strengths ( $f$ ), and nature of transitions in the complexes **1** and **4**.

| Composition                                                                                                                                                                                                                                                                                                                          | E (eV) | Oscillator strength ( $f$ ) | $\lambda_{\text{theo}}$ (nm) | $\lambda_{\text{exp}}$ (nm) |
|--------------------------------------------------------------------------------------------------------------------------------------------------------------------------------------------------------------------------------------------------------------------------------------------------------------------------------------|--------|-----------------------------|------------------------------|-----------------------------|
| <b>Complex 1</b>                                                                                                                                                                                                                                                                                                                     |        |                             |                              |                             |
| HOMO $\rightarrow$ LUMO+2 (88%)<br>HOMO-1 $\rightarrow$ LUMO+3 (6%)                                                                                                                                                                                                                                                                  | 2.76   | 0.0309                      | 448.98                       | 442                         |
| HOMO $\rightarrow$ LUMO+5 (49%)<br>HOMO-12 $\rightarrow$ LUMO+1 (17%)<br>HOMO-1 $\rightarrow$ LUMO+6 (4%)<br>HOMO-2 $\rightarrow$ LUMO+2 (3%)<br>HOMO-10 $\rightarrow$ LUMO+1 (3%)<br>HOMO-3 $\rightarrow$ LUMO+2 (3%)                                                                                                               | 3.56   | 0.0366                      | 348.20                       | 383                         |
| HOMO-12 $\rightarrow$ LUMO (13%)<br>HOMO-3 $\rightarrow$ LUMO+4 (13%)<br>HOMO-13 $\rightarrow$ LUMO+1 (11%)<br>HOMO-14 $\rightarrow$ LUMO+1 (10%)<br>HOMO-10 $\rightarrow$ LUMO+1 (7%)<br>HOMO-9 $\rightarrow$ LUMO+1 (5%)<br>HOMO-3 $\rightarrow$ LUMO+5 (4%)<br>HOMO-13 $\rightarrow$ LUMO (4%)<br>HOMO-14 $\rightarrow$ LUMO (3%) | 4.52   | 0.0609                      | 274.11                       | 274                         |
| HOMO-10 $\rightarrow$ LUMO+2 (53%)<br>HOMO-7 $\rightarrow$ LUMO+4 (9%)<br>HOMO-11 $\rightarrow$ LUMO+2 (7%)<br>HOMO-10 $\rightarrow$ LUMO+3 (3%)<br>HOMO-7 $\rightarrow$ LUMO+5 (3%)<br>HOMO-1 $\rightarrow$ LUMO+7 (2%)<br>HOMO-5 $\rightarrow$ LUMO+6 (2%)                                                                         | 4.91   | 0.0726                      | 252.67                       | 250                         |

| <b>Complex 4</b>       |      |        |        |     |
|------------------------|------|--------|--------|-----|
| HOMO → LUMO+2 (63%)    |      |        |        |     |
| HOMO-2 → LUMO+2 (3%)   |      |        |        |     |
| HOMO-5 → LUMO+2 (3%)   |      |        |        |     |
| HOMO-4 → LUMO+2 (5%)   | 2.94 | 0.0355 | 420.98 | 425 |
| HOMO-6 → LUMO+2 (7%)   |      |        |        |     |
| HOMO-11 → LUMO (15%)   |      |        |        |     |
| <hr/>                  |      |        |        |     |
| HOMO-1 → LUMO+6 (4%)   |      |        |        |     |
| HOMO-1 → LUMO+5 (3%)   |      |        |        |     |
| HOMO-9 → LUMO+4 (45%)  | 4.42 | 0.0429 | 280.62 | 275 |
| HOMO → LUMO+6 (8%)     |      |        |        |     |
| HOMO-10 → LUMO+4 (24%) |      |        |        |     |
| HOMO-6 → LUMO+5 (3%)   |      |        |        |     |
| HOMO-12 → LUMO+2 (2%)  |      |        |        |     |
| HOMO-8 → LUMO+4 (2%)   |      |        |        |     |

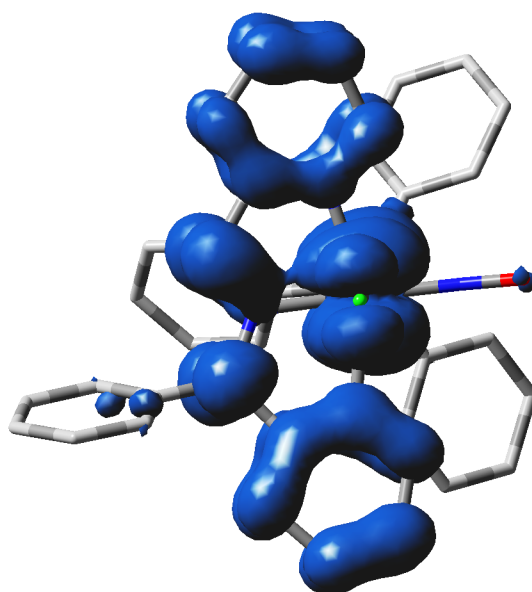

**Fig S16** Spin density distribution in complex **5**.

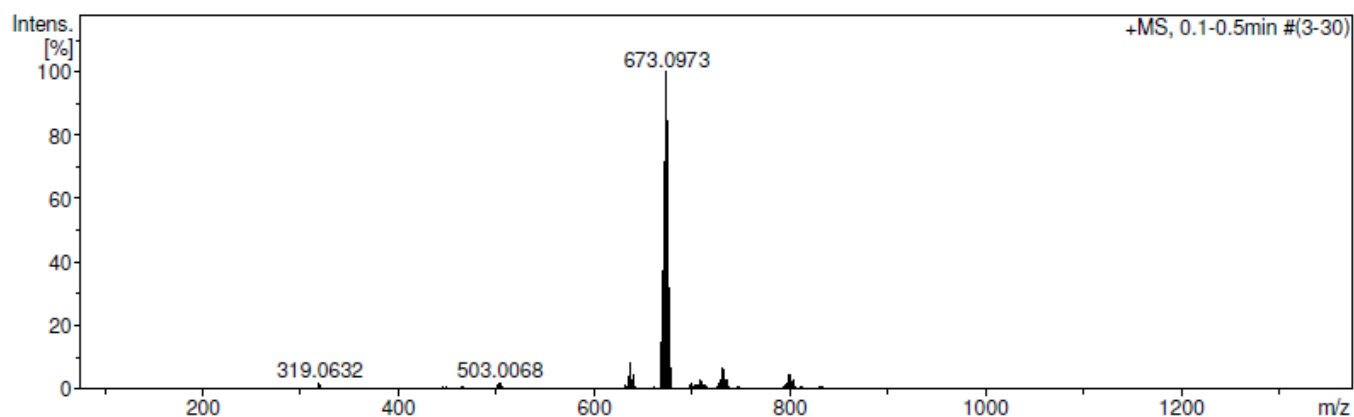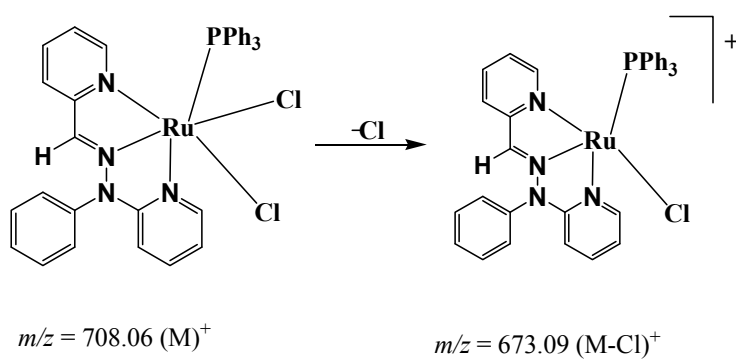

**Fig. S17** ESI-MS spectrum of complex **2** along with fragmentation pattern.

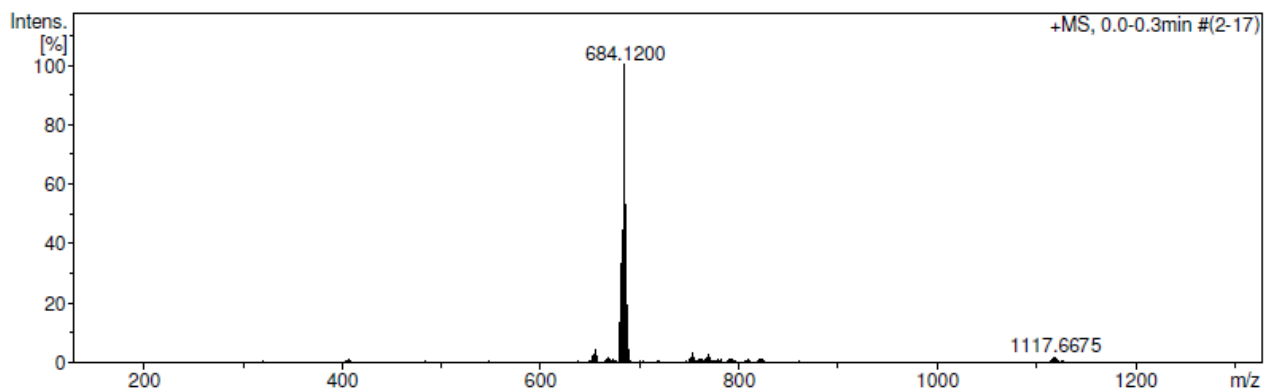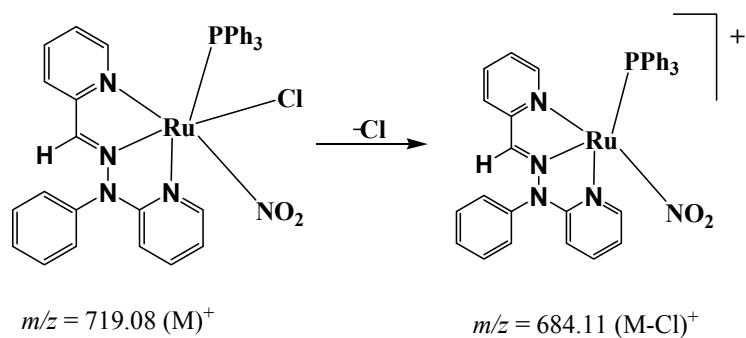

**Fig. S18** ESI-MS spectrum of complex **3** along with fragmentation pattern.



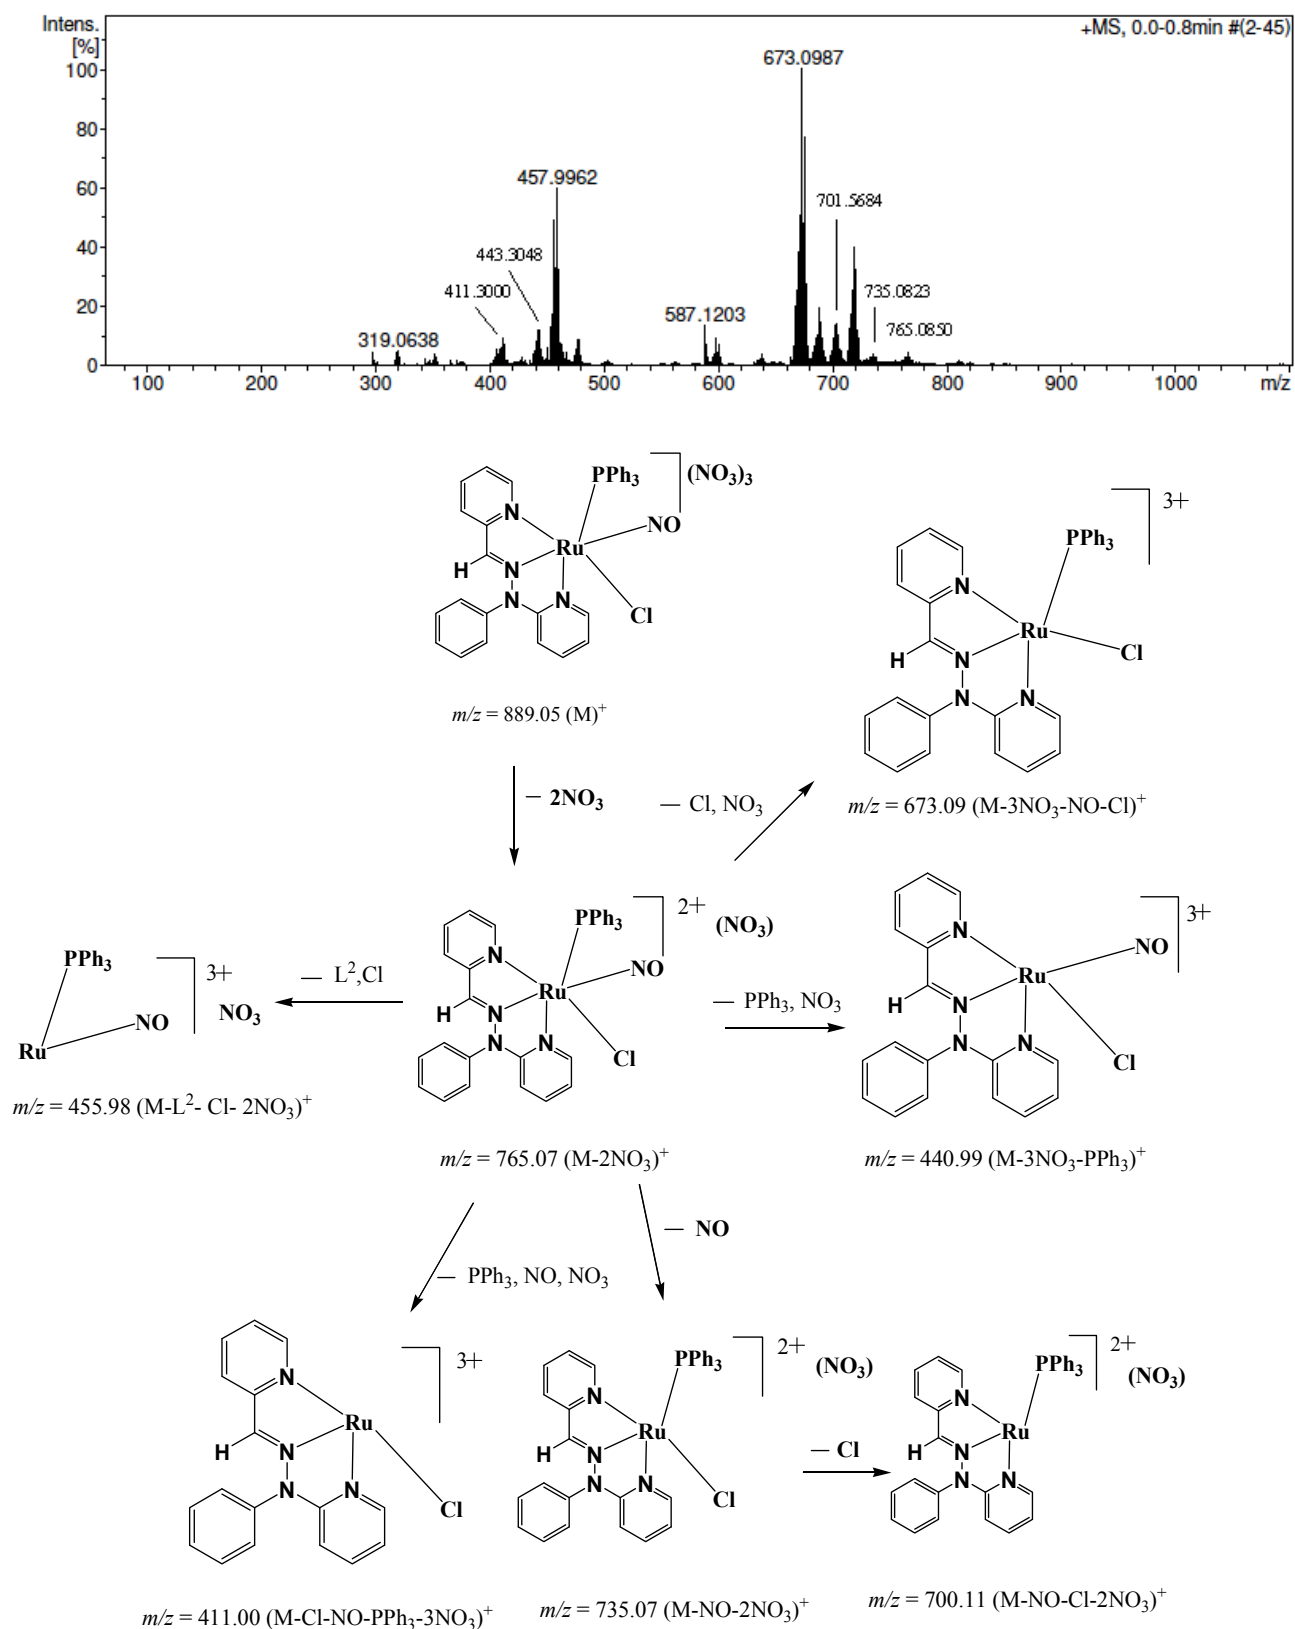

**Fig. S19** ESI-MS spectrum of complex **5** along with fragmentation pattern.
